# Supplementary material
Source: PubMed Central journal article supplement (PMC4542234)
Supplement: AEM.01239-15_zam999116545so1.pdf [file AEM.01239-15_zam999116545so1.pdf]

1 **SUPPLEMENTARY MATERIALS**

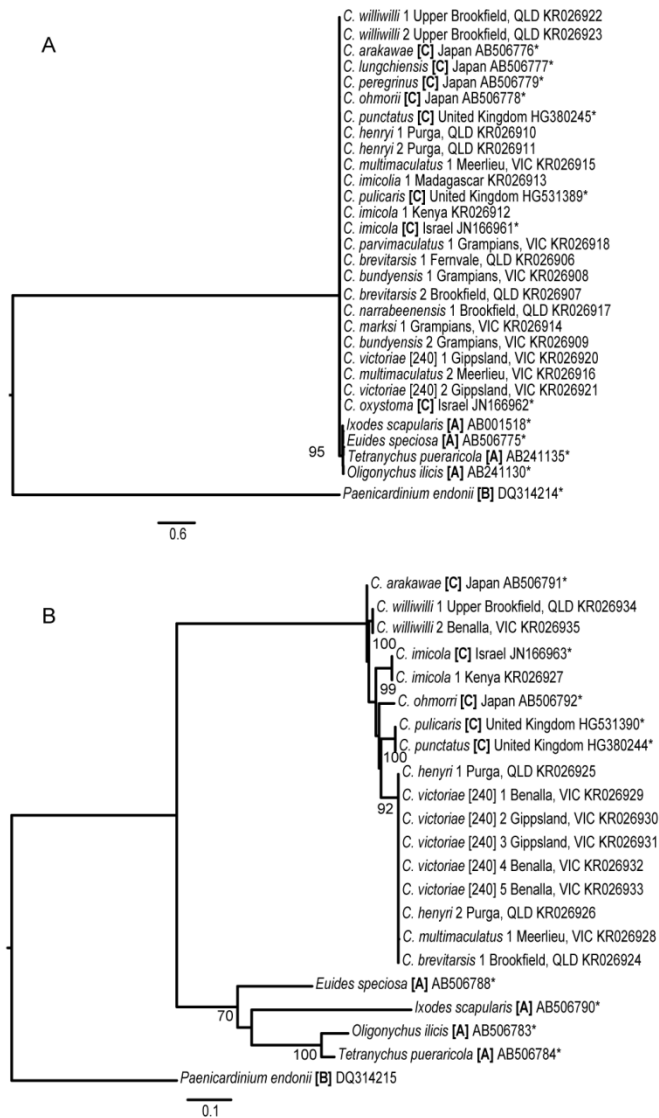

2

3

4 **FIG S1. Maximum-likelihood phylogenetic trees of *Cardinium*.** Based on (A) a

5 505 bp region of 16S rDNA and (B) a 1,088 bp region the *gyrB* gene. Nucleotide

6 sequences were aligned using the Clustal W algorithm employing the Hasegawa-

7 Kishino-Yano (HKY) substitution model for 16S rDNA and the General Time-

8 Reversible (GTR) model for the *gyrB* gene, based on JModelTest2 analysis with

9 1,000 bootstrap replicates. Bootstrap proportions (BSP  $\geq$  70%) are indicated beside

10 nodes. Three *Cardinium* groups included group [A] found in arthropods, group [B]

11 found in plant parasitic nematodes and group [C] found in *Culicoides*. Group [B]  
 12 *Cardinium* was used to root the trees. Capture location is indicated beside species  
 13 name. Asterisks (\*) denote sequences obtained from GenBank; all other sequences  
 14 were generated in this study.

15

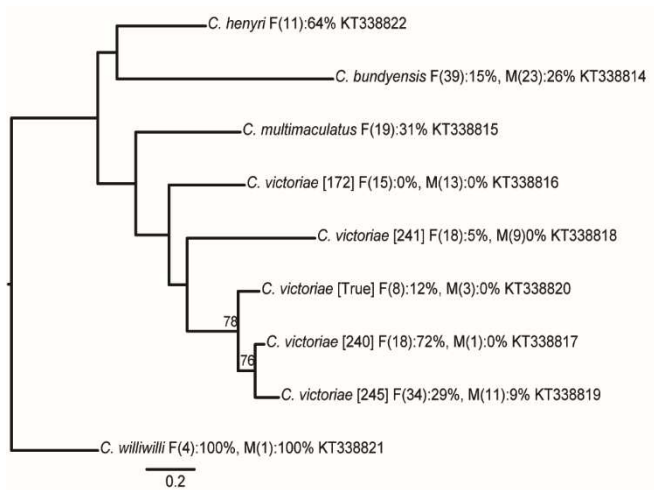

17

18 **Fig S2. Maximum-likelihood phylogenetic tree of COI and *Cardinium* infection**  
 19 **status.** This was based on a 548 bp region of cytochrome oxidase subunit 1 (COI) of  
 20 the *C. victoriae* gp. Nucleotide sequences were aligned using the Clustal W  
 21 algorithm employing the General Time-Reversible (GTR) model substitution model,  
 22 based on JModelTest2 analysis with 1,000 bootstrap replicates. The number of  
 23 females 'F' and males 'M' tested are indicated in parenthesis, with infection status in  
 24 percentage. Bootstrap proportions (BSP  $\geq$  70%) are indicated beside nodes. *C.*  
 25 *williwilli* is not part of *C. victoriae* but is included to root the tree. All sequences were  
 26 generated in this study.

27

28

29

30 **Supplementary Table 1.** Quantification cycle (Cq) values for positive detections with  
 31 quantitative *Wolbachia* and *Cardinium* assays.

| Species                   | <i>Cardinium</i> |     |       |       |       | <i>Wolbachia</i> |     |       |       |       |
|---------------------------|------------------|-----|-------|-------|-------|------------------|-----|-------|-------|-------|
|                           | sex              | no. | min   | mean  | max   | sex              | no. | min   | mean  | max   |
| <i>C. austropalpalis</i>  | F                | 7   | 37.53 | 40.12 | 42.01 | F                | 1   |       | 40.84 |       |
|                           | M                | 3   | 38.31 | 41.32 | 42.50 |                  |     |       |       |       |
| <i>C. narrabeenensis</i>  | F                | 1   |       | 40.86 |       | F                | 3   | 35.73 | 36.83 | 38.67 |
| <i>C. marksii</i>         | F                |     | 36.35 | 39.86 | 42.18 |                  | 1   |       | 40.28 |       |
| <i>C. parvimaclatus</i>   | F                | 8   | 33.03 | 37.23 | 42.68 | F                | 4   | 35.55 | 38.35 | 41.21 |
|                           | M                | 2   | 41.94 | 42.31 | 42.68 |                  |     |       |       |       |
| <i>C. dycei</i>           | F                | 2   | 39.14 | 40.81 | 42.48 |                  |     |       |       |       |
| <i>C. williwilli</i>      | F                | 4   | 26.58 | 29.34 | 31.32 |                  |     |       |       |       |
|                           | M                | 1   |       | 39.78 |       |                  |     |       |       |       |
| <i>C. henryi</i>          | F                | 7   | 33.49 | 36.37 | 40.40 | F                | 1   |       | 40.12 |       |
| <i>C. brevitarsis</i>     | F                | 6   | 36.60 | 38.83 | 42.10 | F                | 5   | 34.50 | 38.58 | 41.30 |
|                           | M                | 1   |       | 39.07 |       |                  |     |       |       |       |
| <i>C. imicola</i>         |                  |     |       |       |       |                  |     |       |       |       |
| (Madagascar)              | F                | 3   | 31.03 | 34.41 | 41.08 |                  | 2   | 39.29 | 39.80 | 40.31 |
| <i>C. imicola</i> (Kenya) | F                | 1   |       | 25.92 |       |                  |     |       |       |       |
| <i>C. wadai</i>           | F                | 1   |       | 40.62 |       |                  |     |       |       |       |
| <i>C. bundyensis</i>      | F                | 6   | 39.95 | 41.23 | 42.50 | F                | 1   |       | 37.56 |       |
|                           | M                | 6   | 31.37 | 38.93 | 42.35 | M                | 2   | 35.71 | 36.79 | 37.86 |
| <i>C. victoriae</i> [245] | F                |     | 29.21 | 38.09 | 42.12 | F                | 3   | 35.96 | 38.62 | 40.08 |
|                           | M                |     |       | 27.79 |       |                  |     |       |       |       |

|                            |   |    |       |       |       |   |   |       |       |       |
|----------------------------|---|----|-------|-------|-------|---|---|-------|-------|-------|
| <i>C. victoriae</i> [241]  | F | 1  |       | 36.87 |       | F | 1 |       | 39.84 |       |
| <i>C. victoriae</i> [240]  | F | 13 | 27.00 | 32.39 | 40.32 |   |   |       |       |       |
| <i>C. victoriae</i> [True] | F | 1  |       | 34.53 |       |   |   |       |       |       |
| <i>C. antennalis</i>       | M | 8  | 33.07 | 38.02 | 42.18 | M | 5 | 30.53 | 37.38 | 38.55 |
| <i>C. Molestus</i> gp sp   |   |    |       |       |       |   |   |       |       |       |
| no2                        | F | 1  |       | 37.42 |       |   |   |       |       |       |
| <i>C. marmoratus</i>       | F | 6  | 34.35 | 38.54 | 41.59 | F | 1 |       | 41.42 |       |
| <i>C. multimaculatus</i>   | F | 6  | 26.80 | 34.65 | 39.60 |   |   |       |       |       |
